# Supplementary material
Source: publisher figshare collection journal article supplement (https://frontiersin.figshare.com/ndownloader/files/29163972)
Supplement: Supplementary file [file 29163972]

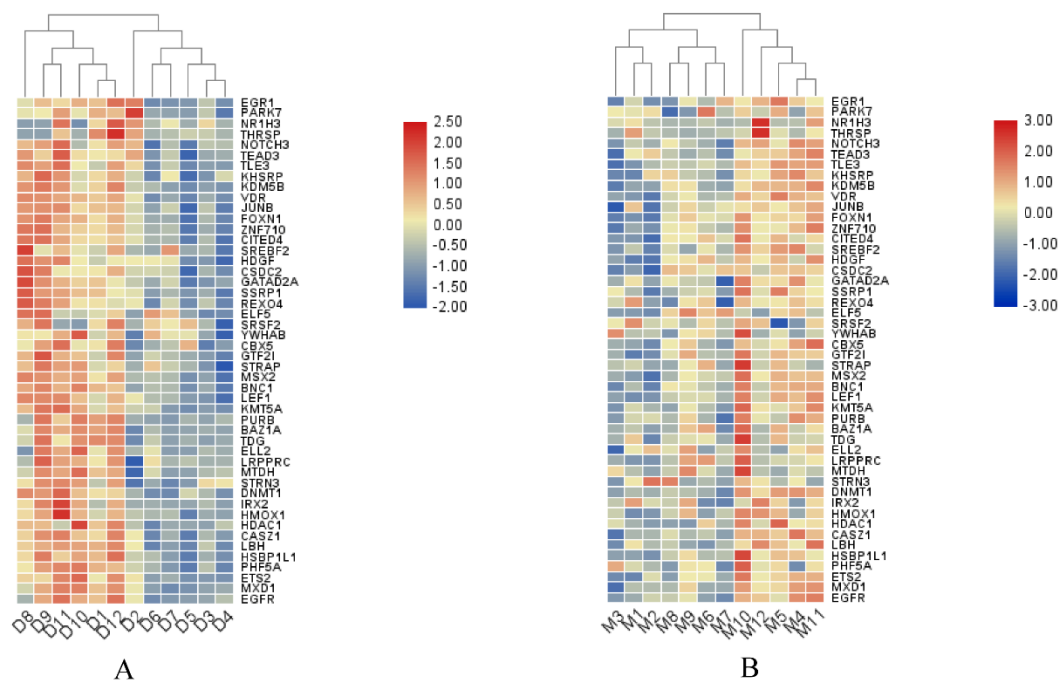

**Supplementary Figure3:** Expression pattern of 26 transcription cofactors and 22 transcription factors. D is the control group, M is the implantation group, and the number is the month
